# Supplementary material for: Oxidative Stress Induces a VEGF Autocrine Loop in the Retina: Relevance for Diabetic Retinopathy
Source: MDPI journal article supplement (doi:10.3390/cells9061452), 2020-06-11
Supplement: s1 [file s1]

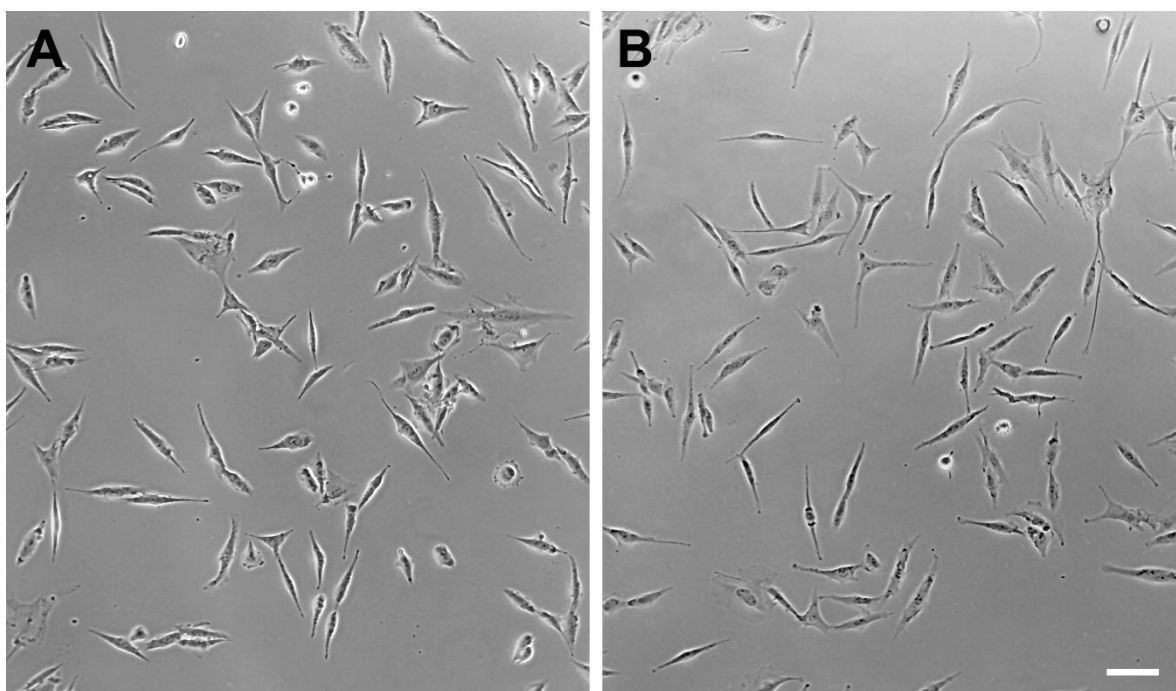

**Figure S1.** Morphology of living MIO-M1 cells (A) and of MIO-M1 cells after fixation for 20 min in 4% paraformaldehyde in PBS and permeabilization with 0.3% Triton X-100 in PBS for 5 min (B). DIC microscopy. Scale bar, 100  $\mu\text{m}$ .

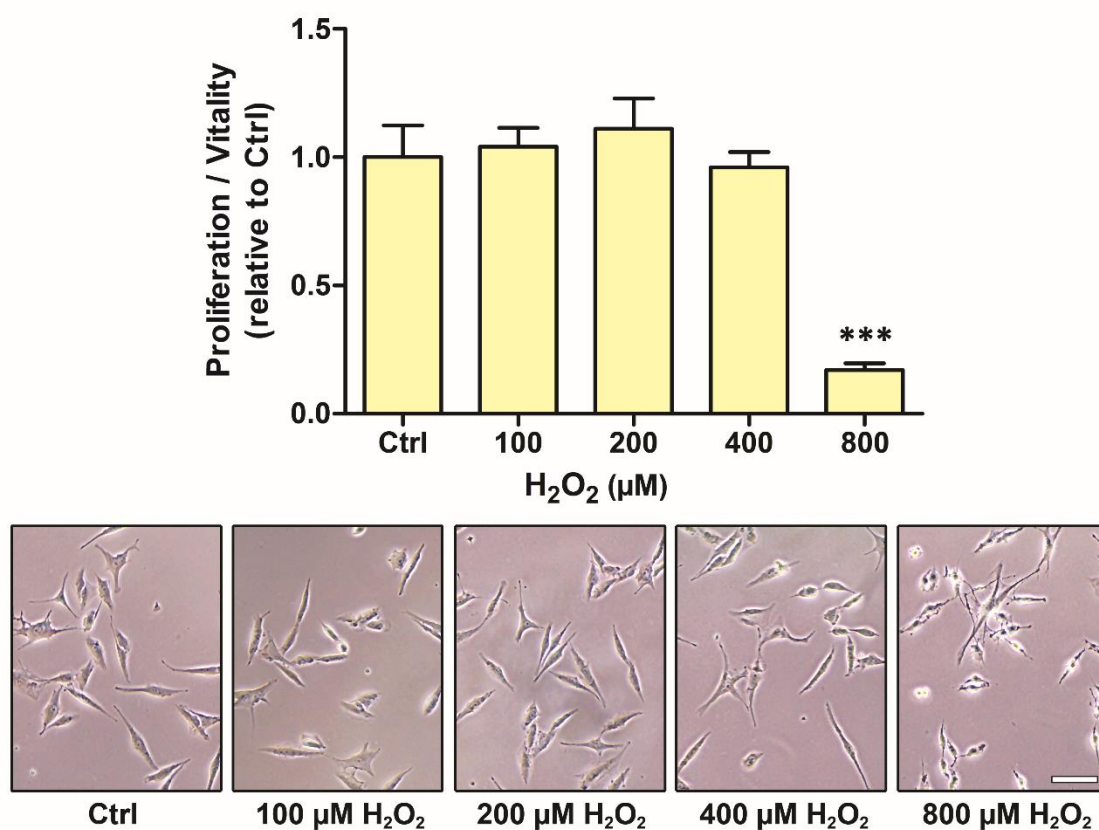

**Figure S2.** Proliferation/vitality of MIO-M1 cells treated with different doses of  $\text{H}_2\text{O}_2$  to determine the  $\text{H}_2\text{O}_2$  concentration to be used in the experiments with MIO-M1 cells. \*\*\*  $p < 0.001$  relative to controls (Ctrl).  $n = 4$ . The photomicrographs were taken with DIC microscopy. Scale bar, 100  $\mu\text{m}$ .

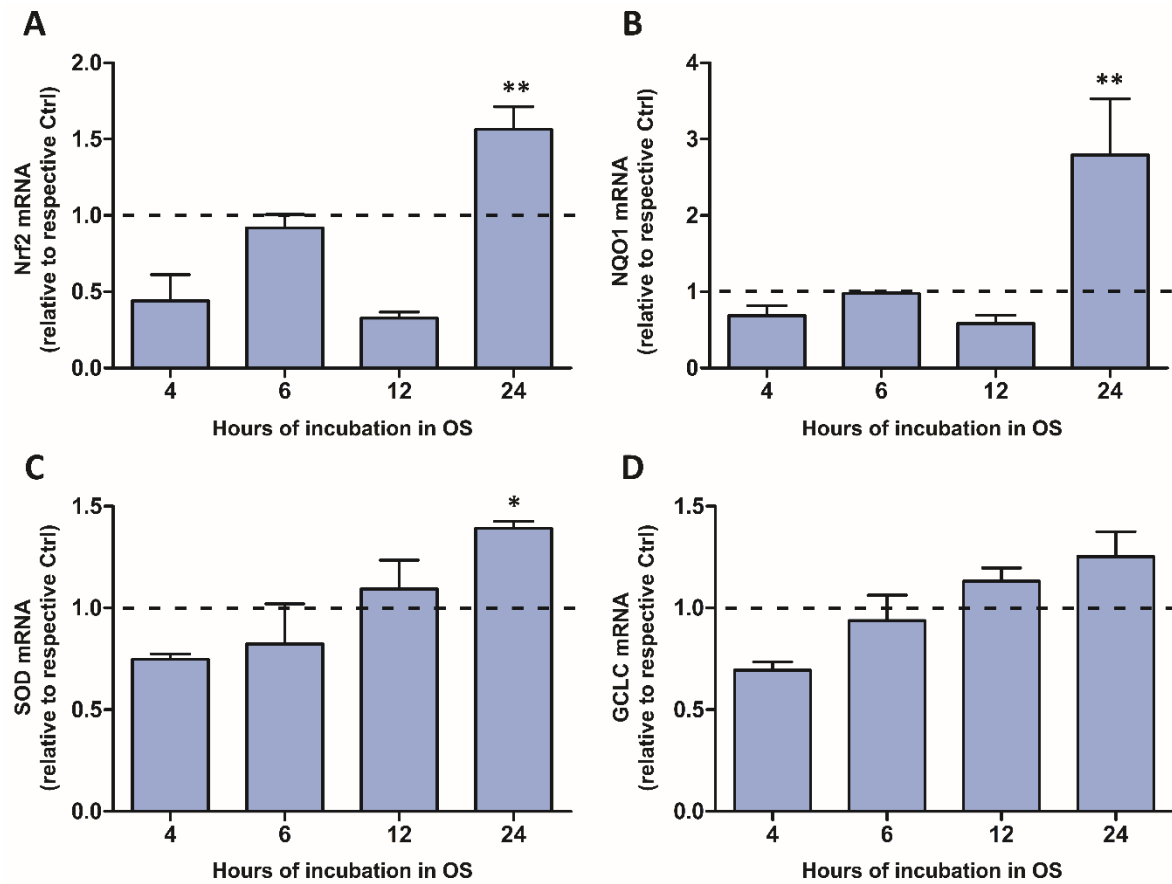

**Figure S3.** Time course of *Nrf2* and of oxidative stress marker expressions in response to OS to determine the shortest incubation time for detecting an effect of OS in retinal explants. \*  $p < 0.05$ , and \*\*  $p < 0.01$  relative to the respective control, represented by the dashed line. Two-way ANOVA followed by Bonferroni post-hoc test.  $n = 3$ .
